# Supplementary material for: Reconstruction of Rh nanoparticles in methanol oxidation reaction
Source: Royal Society of Chemistry journal article supplement (doi:10.1039/c5cy00515a), 2015-01-01
Supplement: c5cy00515a1.pdf [file c5cy00515a1.pdf]

## Supporting information

### Reconstruction of Rh nanoparticles in methanol oxidation reaction

Zhaoxuan Wu, Wenlong Chen, Hongyang Liu, Peng Zhai, Chaoxian Xiao, Dangsheng Su,  
Haichao Liu\* and Ding Ma\*

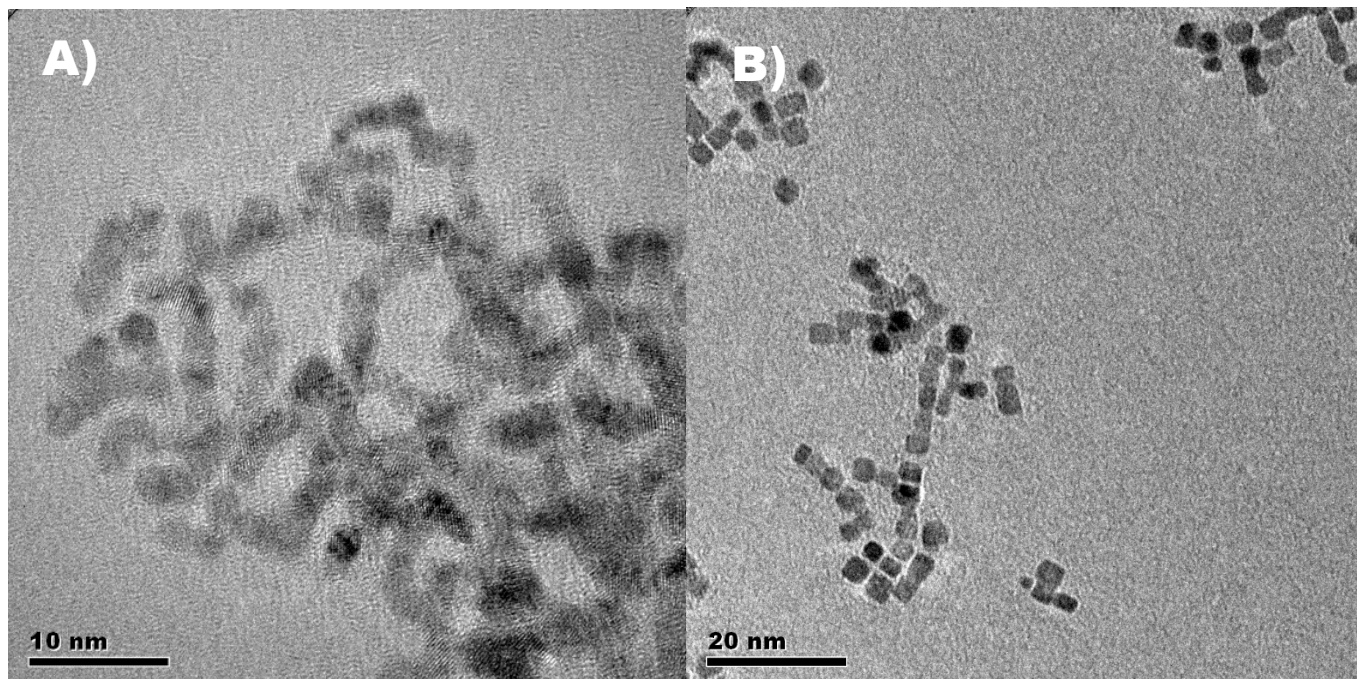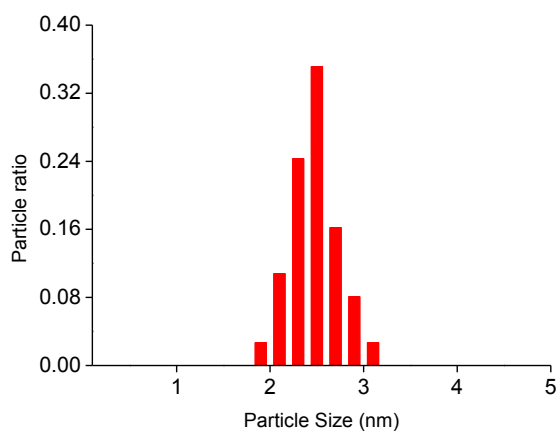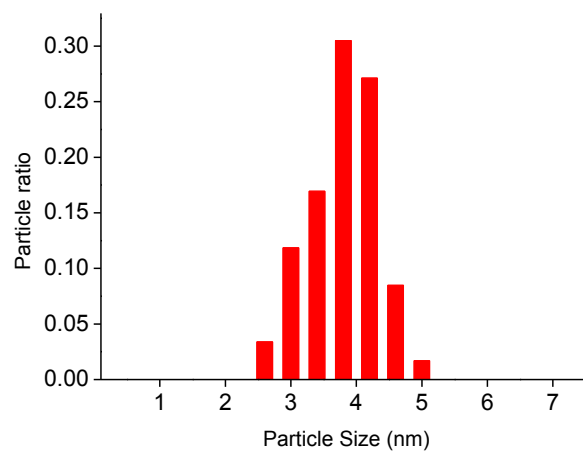

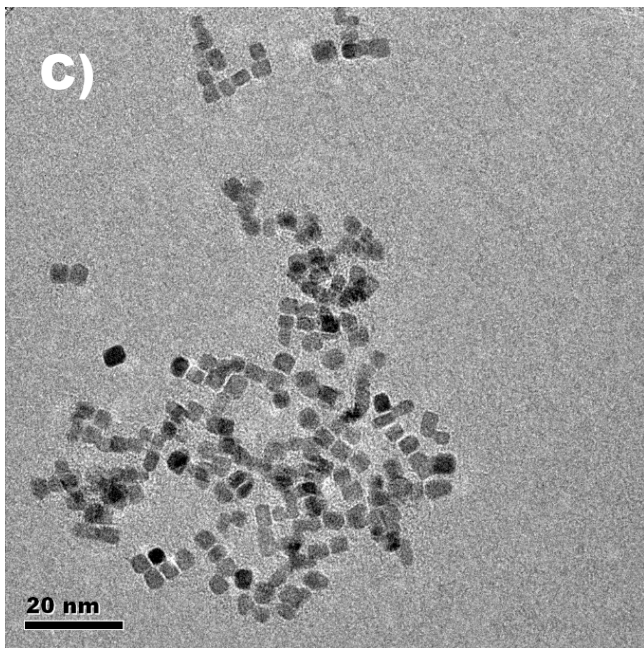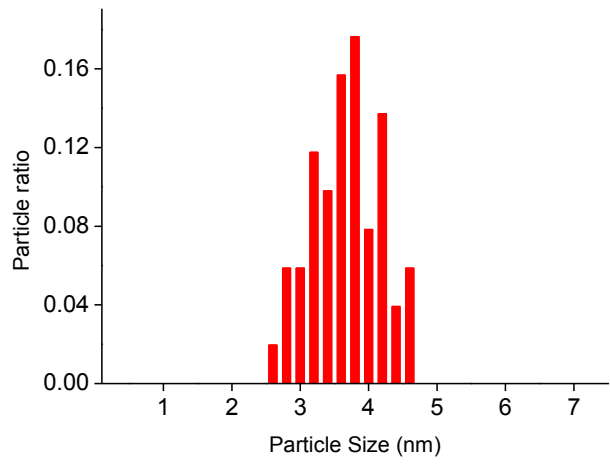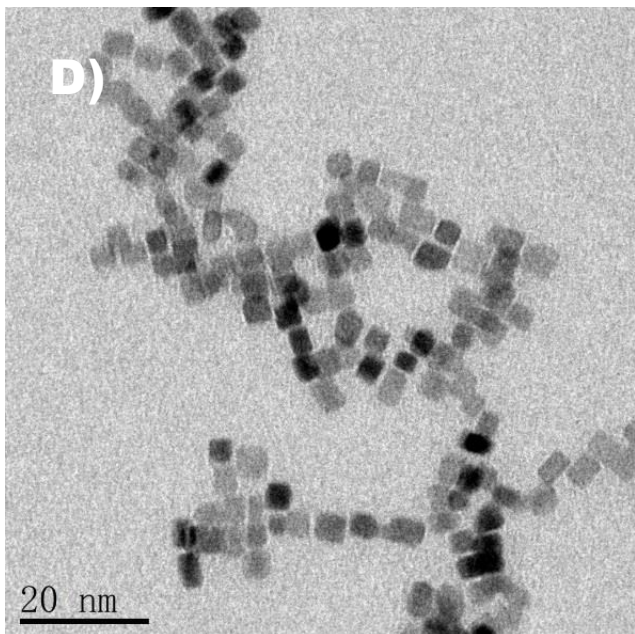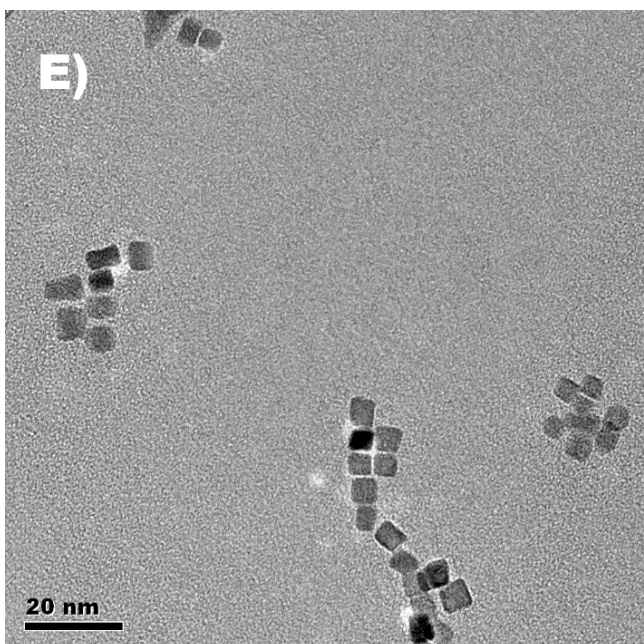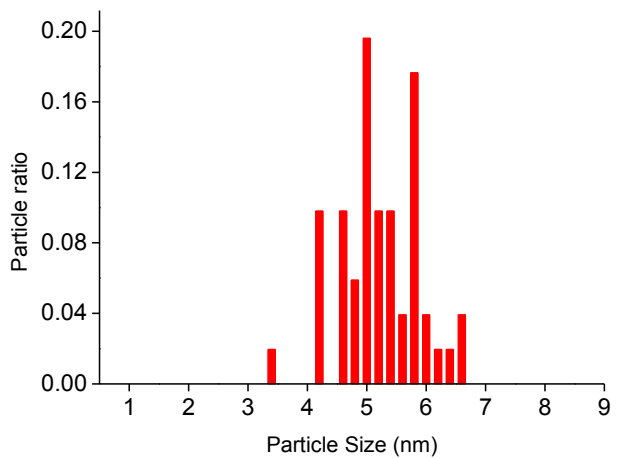



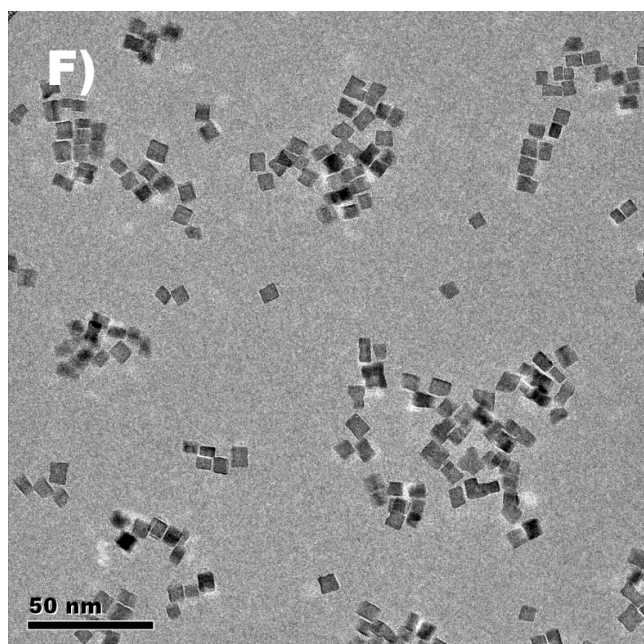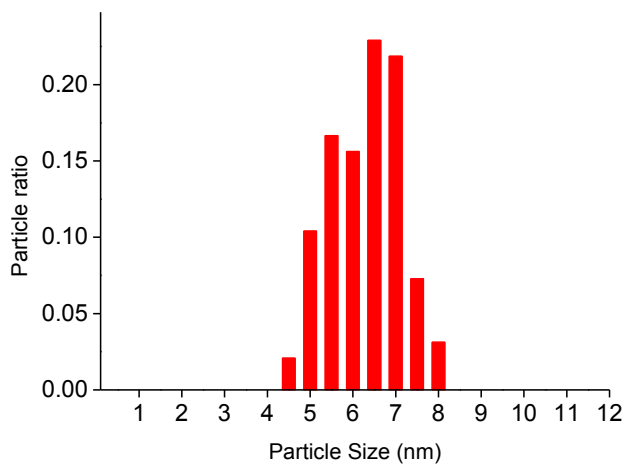

Fig. S1 TEM images and size distributions of Rh-ncs obtained by varying the precursor concentration: (a) 1.25mM; (b) 2.5mM; (c) 5mM; (d) 10mM; (e) 20mM; (f) 40mM, respectively.

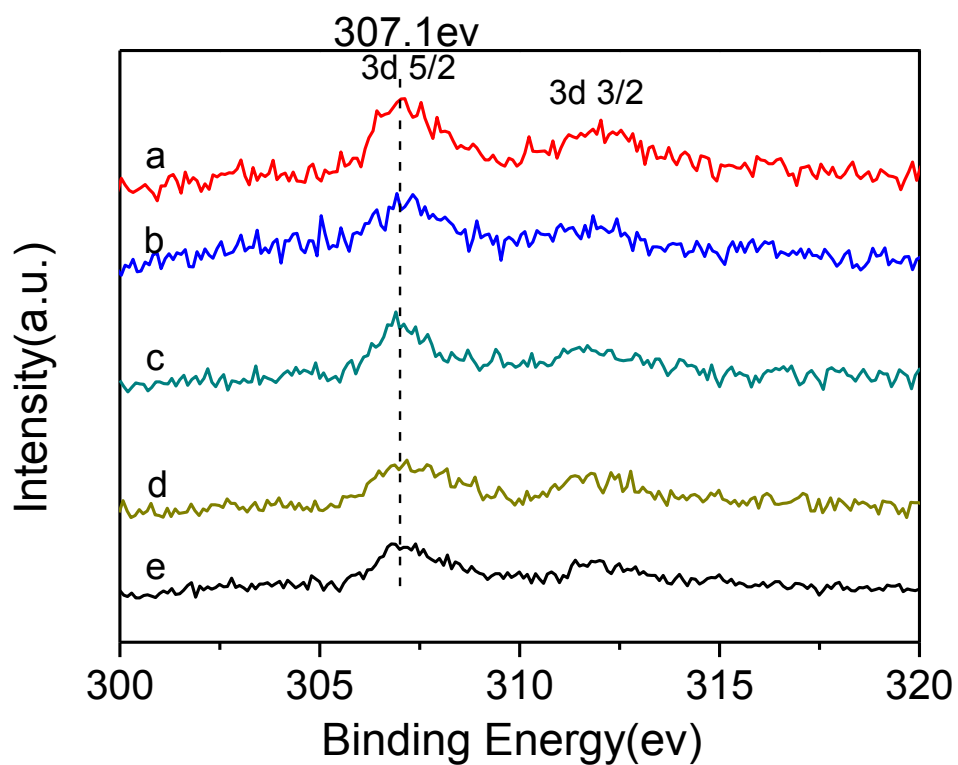

Fig. S2 XPS spectra recorded of different types of Rh-ncs/SiO<sub>2</sub> catalysts. (a) fresh 2.4 nm Rh-ncs/SiO<sub>2</sub>, (b) fresh 5.9 nm Rh-ncs/SiO<sub>2</sub>, (c) 5.9 nm Rh-ncs/SiO<sub>2</sub> that was used at 453 K, (d) 5.9 nm Rh-ncs/SiO<sub>2</sub> that was used with temperature-programmed ramp up to 503 K, (e) 5.9 nm Rh-ncs/SiO<sub>2</sub> was calcined at 503 K.

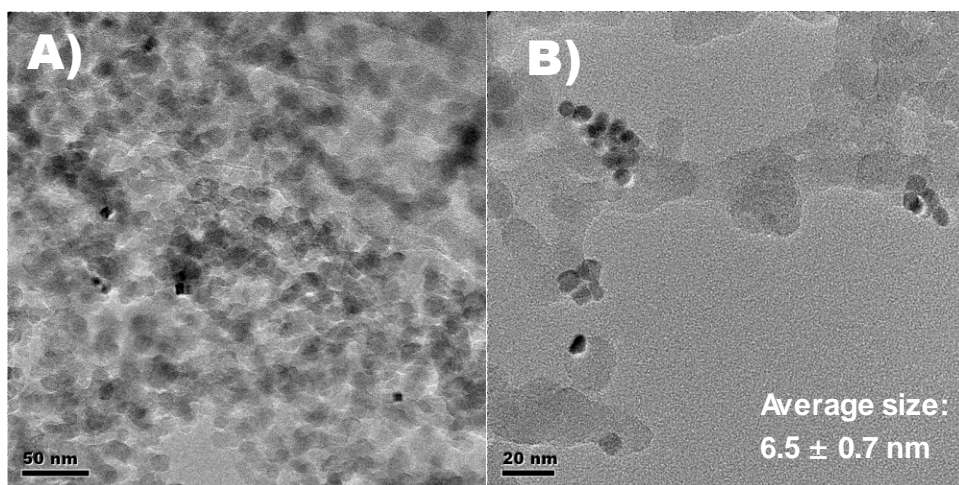

Fig. S3 TEM images of Rh-ncs/SiO<sub>2</sub> catalysts with the average side length of 5.9 nm under various treatments. (a) before reaction; (b) after the reaction at 473 K; The average particle size of figure B is 6.5 nm.

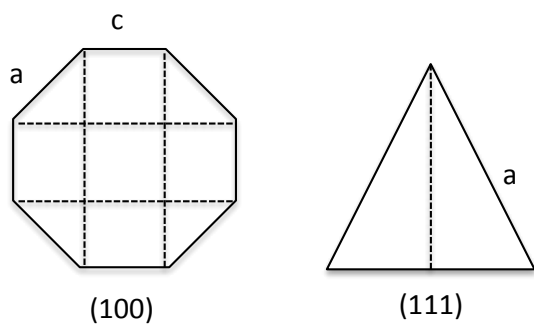

| Catalyst (5.9 nm)     | Side length (a.u.)      |     |     |
|-----------------------|-------------------------|-----|-----|
|                       | normalized length ratio | "a" | "c" |
| fresh catalyst        | 0.37                    | 68  | 185 |
| used catalyst (453 K) | 0.58                    | 88  | 153 |
| used catalyst (473 K) | 0.9                     | 91  | 101 |

Fig. S4 Two-dimensional diagram of (100) and (111) facets in Rh-ncs.

$$\text{area (100)}=6(a^2+2\sqrt{2}ac+c^2), \text{ area (111)}=2\sqrt{3}a^2.$$

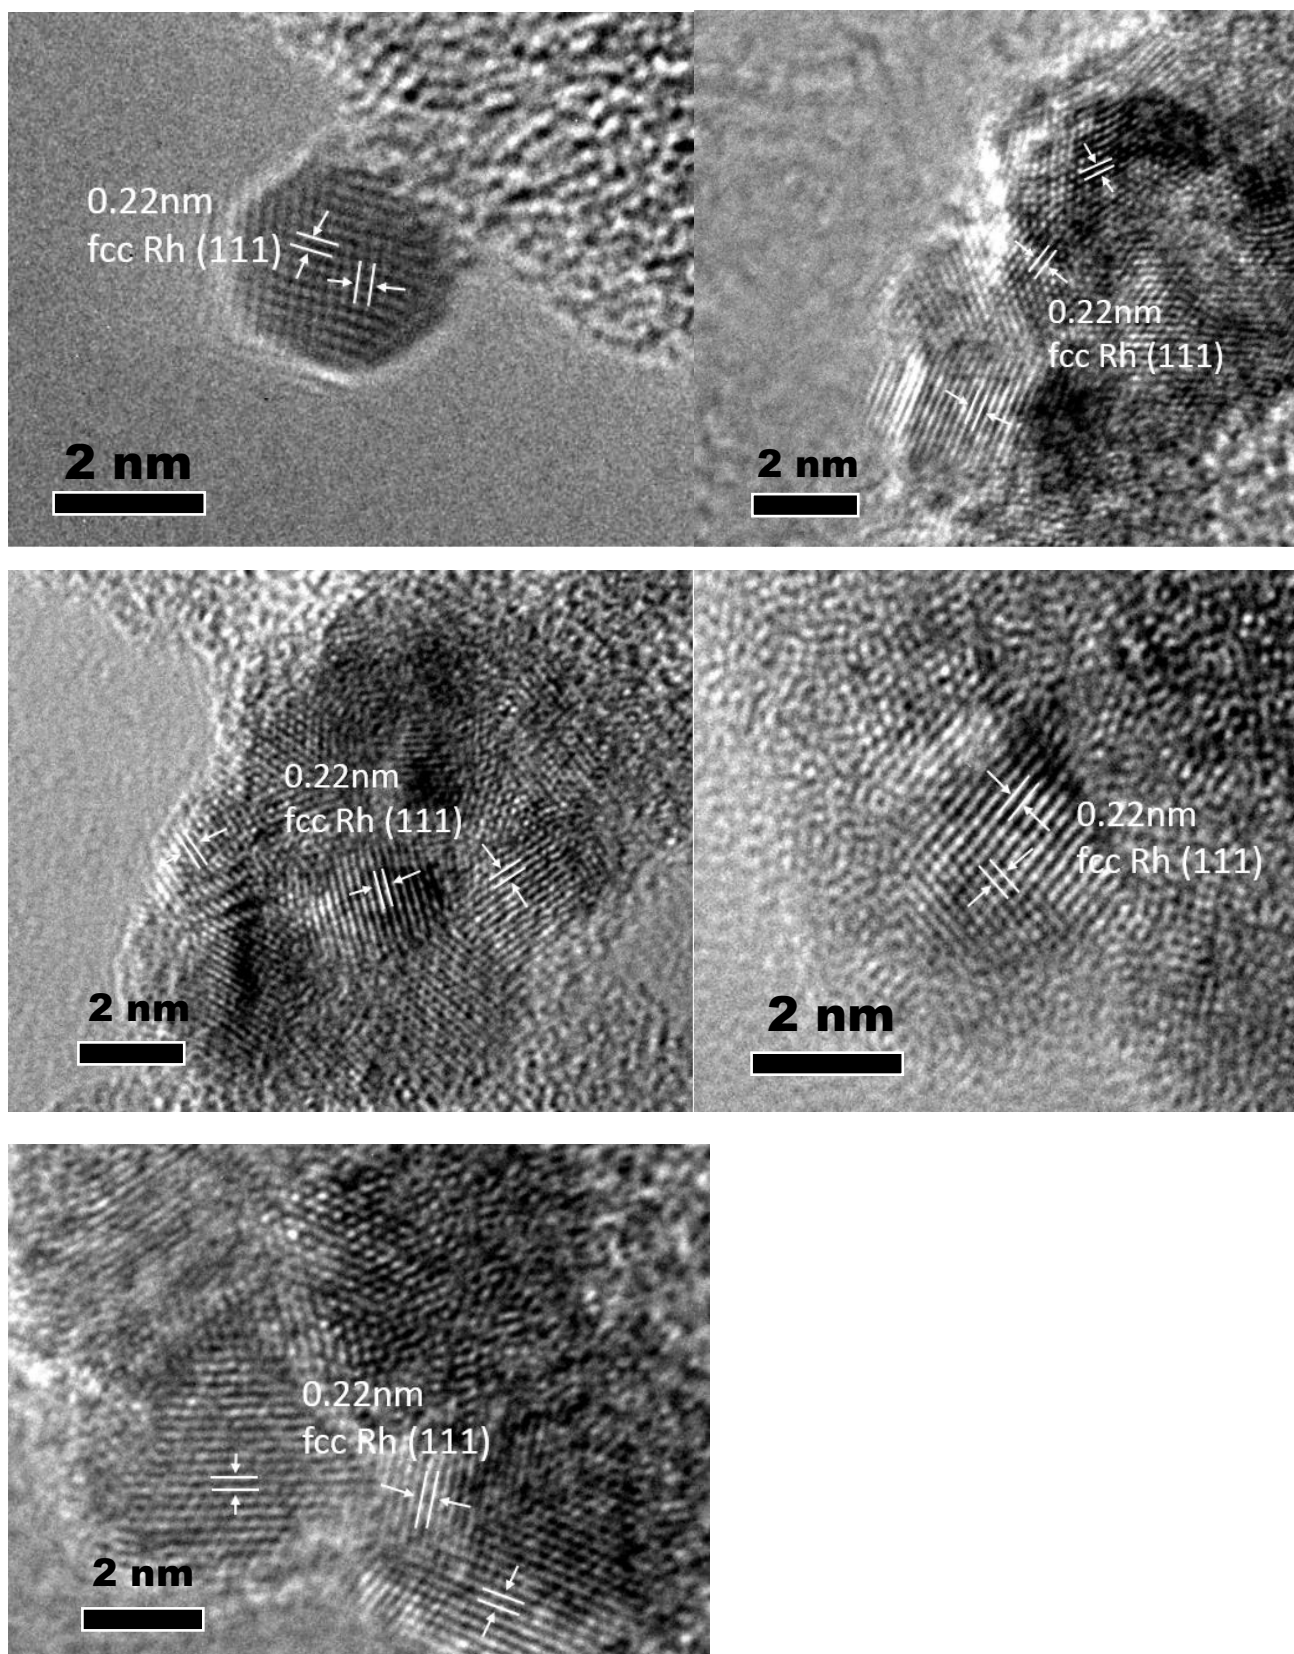

Fig. S5 HR-TEM images and the interplanar spacing of 5wt% Rh/SiO<sub>2</sub>-imp catalyst.

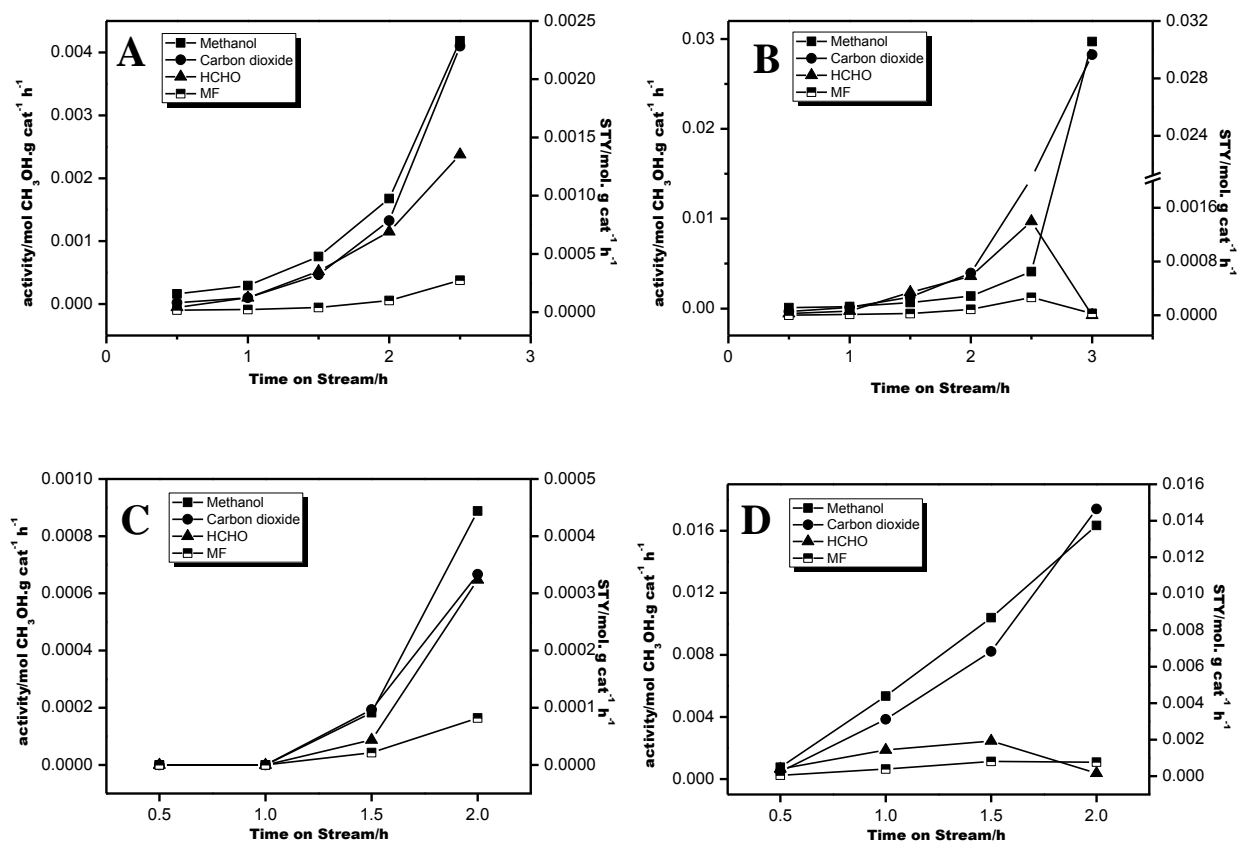

Fig. S6 The activity and selectivity of two Rh-ncs/SiO<sub>2</sub> catalysts (A, B, with the average side length of 2.4 nm, C, D, with the average side length of 5.9 nm) in the methanol oxidation reaction at 453 K for A, C, and 473 K for B, D. Oxygen content was about 25% and balanced with N<sub>2</sub>.

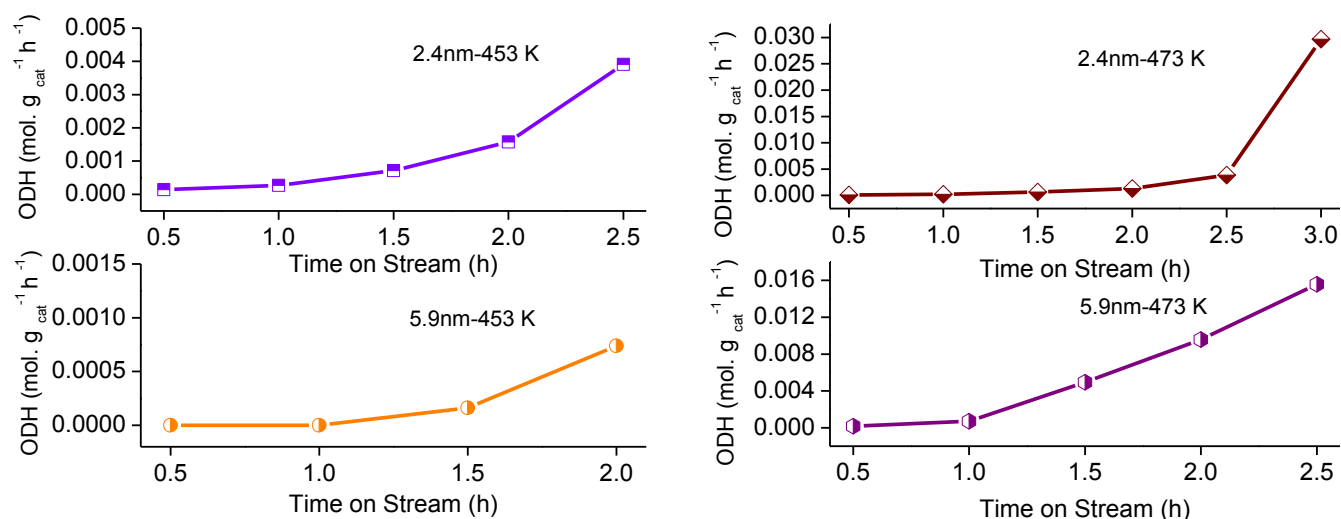

Fig. S7 ODH activity of two Rh-ncs/SiO<sub>2</sub> catalysts. The reaction condition was as the same as upper figure. (The irreversible nature of the oxidative conversion of CH<sub>3</sub>OH to HCHO requires one oxidative CH<sub>3</sub>OH dehydrogenation (ODH) event for each HCHO, DMM, and MF molecule formed. ODH rates rigorously reflect the intrinsic oxidation reactivity of active domains, without contributions from methanol molecules consumed because of various secondary reactions.)

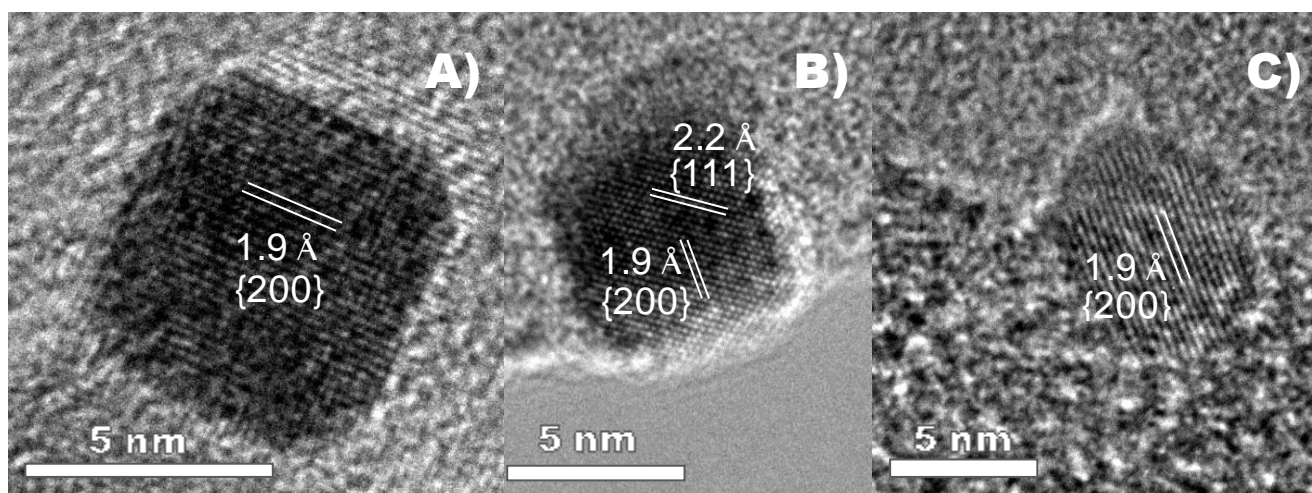

Fig. S8 The interplanar spacing of Rh ncs in HR-TEM images (Figure 6).

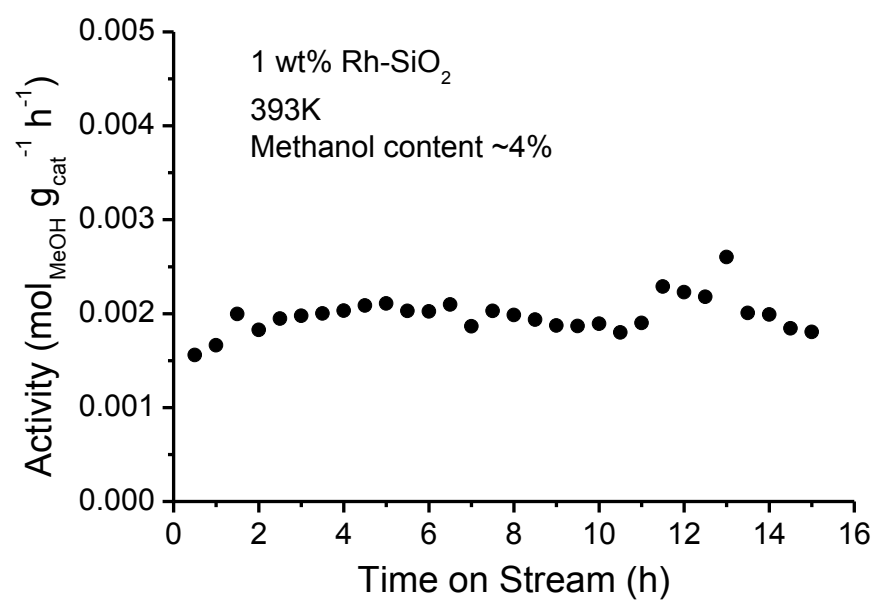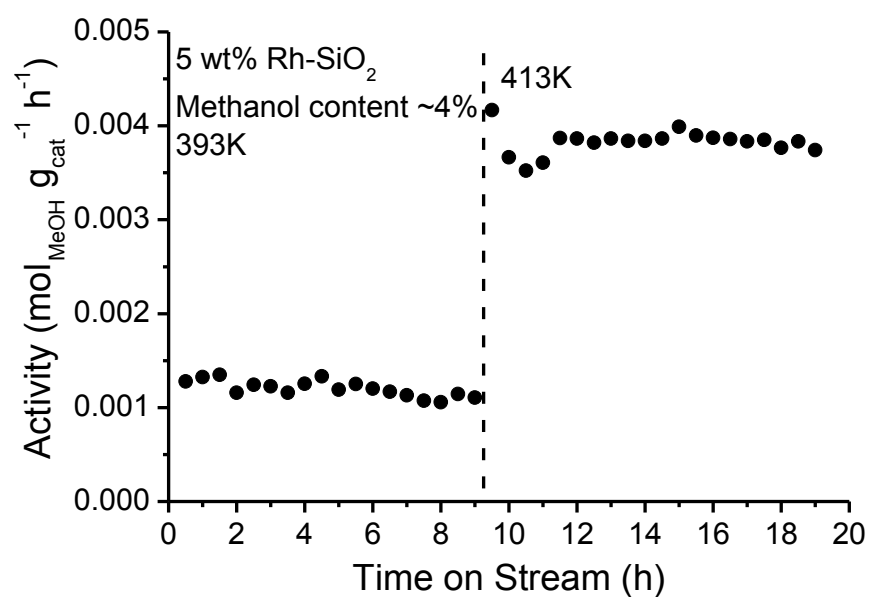

Fig. S9 Stability of impregnation-derived Rh/SiO<sub>2</sub> catalyst.
